# Supplementary material for: By-Products from Winemaking and Olive Mill Value Chains for the Enrichment of Refined Olive Oil: Technological Challenges and Nutraceutical Features
Source: PubMed Central journal article supplement (PMC7601883; doi:10.3390/foods9101390), 2020-10-01
Supplement: foods-09-01390-s001.pdf [file foods-09-01390-s001.pdf]

**Table S1.** UHPLC-HR-ESI-MS/MS data of components 1–48 detected in refined olive oil (ROO) control (sample a), phenol-enriched ROO from pomace (PE-P-B, sample b), olive leaves (PE-OL-B, sample c), and grape marc (PE-GM-B, sample d).

| Peak<br>1           | Compound 2                                                     | <i>t</i> <sub>R</sub><br>(min) | HR-<br>[M-H] <sup>-</sup><br>( <i>m/z</i> ) | HR-MS/MS<br>Product Ions<br>( <i>m/z</i> )          | Error<br>(ppm) | Sample |
|---------------------|----------------------------------------------------------------|--------------------------------|---------------------------------------------|-----------------------------------------------------|----------------|--------|
| <i>Secoiridoids</i> |                                                                |                                |                                             |                                                     |                |        |
| 1                   | Hydroxytyrosol<br>(3,4-DHPEA)                                  | 2.2                            | 153.0550                                    | 123.04                                              | -4.57          | a–d    |
| 3                   | Hydroxylated decarboxymethyl<br>elenolic acid                  | 4.6                            | 199.0606                                    | 155.07, 111.08,<br>95.05, 85.03, 69.03,<br>59.01    | -3.01          | a–c    |
| 5                   | Hydroxytyrosol acetate, isomer I                               | 8.7                            | 195.0657                                    | 59.01                                               | -3.08          | a–c    |
| 6                   | Hydroxylated elenolic acid,<br>isomer I                        | 9.1                            | 257.0665                                    | 181.05, 137.06,<br>109.07, 95.05                    | -0.77          | a,b    |
| 9                   | Hydroxylated elenolic acid,<br>isomer II                       | 10.3                           | 257.0665                                    | 181.05, 137.06,<br>109.07, 95.05                    | -0.77          | a,b,d  |
| 11                  | Elenolic acid                                                  | 10.8                           | 241.0715                                    | 139.00, 127.04,<br>101.02, 95.05, 69.00             | -3.32          | a,b,d  |
| 12                  | Hydroxytyrosol acetate                                         | 12.3                           | 195.0657                                    | 59.01                                               | -3.08          | a–c    |
| 13                  | 10-Hydroxy-oleuropein aglycone<br>decarboxymethyl              | 12.6                           | 335.1130                                    | 199.06, 155.07,<br>111.08, 59.01                    | -1.79          | a–d    |
| 15                  | Oleuropein aglycone, isomer I                                  | 13.3                           | 377.1236                                    | 307.08, 275.06,<br>139.04, 111.01, 95.04            | -1.59          | a      |
| 16                  | Oleuropein aglycone, isomer II                                 | 13.4                           | 377.1236                                    | 307.08, 275.06,<br>139.04, 111.01, 95.04            | -1.59          | a      |
| 21                  | Lygstroside aglycone<br>decarboxymethyl (oleocanthal)          | 14.6                           | 303.1232                                    | 165.06, 137.06,<br>69.03, 59.01                     | -1.98          | a,b    |
| 23                  | Oleacein, isomer I<br>(oleuropein aglycone<br>decarboxymethyl) | 14.9                           | 319.1182                                    | 199.06, 181.05,<br>155.07, 111.01,<br>85.03, 59.01  | -1.57          | a–d    |
| 26                  | Ligstroside aglycone, isomer I                                 | 15.7                           | 361.1288                                    | 291.09, 259.10,<br>101.02, 69.00, 59.01             | -1.38          | a,b    |
| 27                  | Oleuropein aglycone, isomer II                                 | 15.9                           | 377.1236                                    | 307.08, 275.06,<br>139.04, 111.01, 95.04            | -1.59          | a,b,d  |
| 29                  | Hydroxy oleuropein aglycone,<br>isomer I                       | 16.2                           | 393.1186                                    | 317.02, 181.05,<br>153.06, 137.06,<br>109.06        | -1.27          | a,b,d  |
| 33                  | Oleuropein aglycone, isomer III                                | 17.0                           | 377.1236                                    | 307.08, 275.06,<br>139.04, 111.01, 95.05            | -1.59          | a–d    |
| 36                  | Ligstroside aglycone, isomer II                                | 17.9                           | 361.1288                                    | 291.09, 259.10,<br>101.02, 69.00                    | -1.38          | a      |
| 38                  | Oleuropein aglycone, isomer IV                                 | 18.2                           | 377.1234                                    | 333.13, 301.11,<br>181.05, 137.06,<br>109.07, 59.01 | -2.12          | a,d    |
| 39                  | Dehydro oleuropein aglycone                                    | 18.5                           | 375.1082                                    | 239.05, 195.07,<br>179.03, 137.02                   | -0–80          | b,d    |
| 41                  | Oleuropein aglycone, isomer V                                  | 18.8                           | 361.1287                                    | 291.09, 259.10,<br>101.02, 69.00                    | -1.66          | a,b    |
| 45                  | Oleuropein aglycon derivative                                  | 19.6                           | 349.1287                                    | 213.08, 181.05,<br>137.06, 109.06                   | -1.72          | a      |
| <i>Flavonoids</i>   |                                                                |                                |                                             |                                                     |                |        |
| 8                   | Quercetin 3- <i>O</i> -<br>glucoside/galactoside               | 9.8                            | 463.0881                                    | 300.03, 271.02,<br>255.03, 151.00                   | -0.22          | d      |

|                               |                                                   |      |          |                                                     |       |     |
|-------------------------------|---------------------------------------------------|------|----------|-----------------------------------------------------|-------|-----|
| 14                            | Quercetin                                         | 12.8 | 301.0349 | 273.04, 179.00,<br>151.00, 121.03                   | -1.66 | d   |
| 17                            | Luteolin                                          | 13.6 | 285.0400 | 199.04, 151.00,<br>133.03                           | -1.75 | a-d |
| 24                            | Kaempferol                                        | 14.9 | 285.0403 | 257.04, 229.05                                      | -070  | d   |
| 25                            | Apigenin                                          | 15.6 | 269.0452 | 225.05, 151.00,<br>117.03                           | -1.11 | a-d |
| 32                            | Methoxyluteolin                                   | 16.6 | 299.0557 | 284.03, 256.04,<br>155.04                           | -1.34 | c   |
| <i>Organic acids</i>          |                                                   |      |          |                                                     |       |     |
| 2                             | 2-Isopropyl malic acid/2-<br>isopropyl malic acid | 3.3  | 175.0605 | 131.07, 115.04,<br>113.06, 85.07                    | -3.99 | d   |
| 4                             | Gallic acid ethyl ester                           | 6.6  | 197.0449 | 169.01, 125.02,<br>111.01                           | -3.04 | d   |
| 7                             | Dihydroxybenzoic acid ethylester                  | 9.4  | 181.0499 | 153.02, 109.03                                      | -3.87 | d   |
| 10                            | Azelaic acid                                      | 10.6 | 187.0969 | 169.09, 125.10, 97.06                               | -3.74 | c,d |
| 42                            | Dihydroxyhexadecanoic acid                        | 18.9 | 287.2225 | 269.21, 241.22                                      |       | c   |
| <i>Unidentified compounds</i> |                                                   |      |          |                                                     |       |     |
| 18                            | Ligstroside derivative                            | 13.8 | 363.1447 | 139.08, 95.05, 69.03,<br>59.01                      |       | b   |
| 19                            | Oleuropein derivative                             | 13.9 | 379.1395 | 199.06, 181.05,<br>151.04, 111.08,<br>95.05, 59.01  |       | b   |
| 20                            | Hydroxytyrosol derivative,<br>isomer I            | 14.1 | 365.1237 | 229.07, 185.08,<br>153.05, 109.06                   |       | a,d |
| 22                            | Unidentified                                      | 14.4 | 169.0864 | 125.10, 83.05, 71.05,<br>55.02                      |       | d   |
| 28                            | Ligstroside aglycone derivative                   | 16.0 | 439.1289 | 213.07, 181.05,<br>153.05, 137.06,<br>111.01, 95.05 |       | c   |
| 30                            | Hydroxytyrosol derivative                         | 16.3 | 291.1236 | 155.07, 111.08,<br>69.03, 59.01                     |       | b   |
| 31                            | Hydroxytyrosol derivative,<br>isomer II           | 16.4 | 365.1600 | 229.11, 185.12,<br>153.09, 139.07,<br>121.06        |       | c   |
| 34                            | Unidentified                                      | 17.6 | 293.1754 | 236.10, 221.15,<br>148.05, 71.01                    |       | a-d |
| 35                            | Unidentified                                      | 17.7 | 329.2330 | 229.14, 211.13,<br>171.10, 139.11                   |       | d   |
| 37                            | Dihydroxybenzoic acid derivative                  | 18.0 | 325.0845 | 153.05, 109.06, 91.05                               |       | b,c |
| 40                            | Dihydroxybenzoic acid derivative                  | 18.7 | 455.1706 | 385.13, 153.05,<br>109.06, 95.05                    |       | c   |
| 43                            | Unidentified                                      | 19.3 | 227.1648 | 209.15, 158.98,<br>130.98                           |       | d   |
| 44                            | Hydroxy oleuropein aglycone,<br>isomer II         | 19.5 | 393.1917 | 257.14, 139.08,<br>109.06, 95.5, 59.01              |       | b,d |
| 46                            | Dihydroxybenzoic acid derivative                  | 19.8 | 369.1105 | 333.13, 153.05,<br>109.06, 91.05                    |       | b   |
| 47                            | Unidentified                                      | 20.1 | 297.1703 | 279.16, 253.18,<br>235.17                           |       | d   |
| 48                            | Unidentified                                      | 20.7 | 387.2859 | 283.27, 102.05, 75.01                               |       | a   |

<sup>1</sup> Compound numbers correspond with peak numbers showed in Figure 2. <sup>2</sup> Tentatively identified based on MS/MS and literature data.
